# Supplementary material for: Contributions of Subtypes of Non-Hodgkin Lymphoma to Mortality Trends
Source: Oxford University Press journal article supplement (doi:10.1158/1055-9965.epi-15-0921), 2015-10-15
Supplement: 10559965epi150921-sup-154655_1_supp_0_nvvp6m.doc [file 10559965epi150921-sup-154655_1_supp_0_nvvp6m.doc]

**Figure Legend**

**Supplementary Figure 1. Non-Hodgkin Lymphoma (NHL) Death Certificate Mortality and Incidence-based Mortality (IBM) Rates. SEER-9, 1975-2011.**

The black solid line shows death certificate mortality rates for NHL, while the dashed red line shows the corresponding incidence-based mortality (IBM) rates. To the left of the vertical line in calendar year 1990, the IBM rates underestimate NHL mortality, while the correspondence is closer to the right of the vertical line (i.e., after calendar year 1990). Results are shown for nine SEER registries (San Francisco, Connecticut, Detroit, Hawaii, Iowa, New Mexico, Seattle, Utah, and Atlanta). For death certificate mortality rates, attribution to NHL death is made when the COD on the death certificates is stated as NHL (International Classification of Diseases, version 9 [ICD-9] code: 200, 202.0-202.2, 202.8-202.9; ICD-10 code: C82-C85, C96.3). For IBM rates, attribution to NHL death is made when the COD is stated as NHL, Hodgkin lymphoma (ICD-9: 201; ICD-10: C81), plasma cell neoplasm (ICD-9: 203.0, 238.6; ICD-10: C90.0, C90.2), or leukemia (ICD-9: 204.0, 204.1, 202.4, 204.2, 204.8-204.9. 205.0, 207.0, 207.2, 206.0, 205.1, 205.2-205.3, 205.8-205.9, 206.1-206.2, 206.8-206.9, 208.0, 203.1, 207.1, 207.8, 208.1-208.2, 208.8-208.9; ICD-10 code: C91.0, C91.1, C91.2-C91.4, C91.7, C91.9, C92.0, C92.4-C92.5, C94.0, C94.2, C93.0, C92.1, C92.2-C92.3, C92.7, C92.9, C93.1-C93.2, C93.7, C93.9, C94.4, C94.5, C95.0, C90.1, C91.5, C94.1, C94.3, C94.7, C95.1, C95.2, C95.7, C95.9).
